# Supplementary material for: Palladium(ii) complexes featuring a mixed phosphine–pyridine–iminophosphorane pincer ligand: synthesis and reactivity
Source: Royal Society of Chemistry journal article supplement (doi:10.1039/c5dt02789f), 2015-08-26
Supplement: c5dt02789f1.pdf [file c5dt02789f1.pdf]

Supporting information for:

Palladium(II) complexes featuring a mixed  
Phosphine-Pyridine-Iminophosphorane pincer  
ligand : synthesis and reactivity

Thibault Cheisson and Audrey Auffrant\*

Laboratoire de Chimie Moléculaire, Ecole Polytechnique, UMR CNRS 9168, F-91128

Palaiseau Cedex.

E-mail: [audrey.auffrant@polytechnique.edu](mailto:audrey.auffrant@polytechnique.edu);

## Table of contents

|                                        |    |
|----------------------------------------|----|
| Crystallographic data.....             | S3 |
| NMR spectra.....                       | S6 |
| <sup>1</sup> H DOSY NMR of L.LiCl..... | S8 |

## I. Crystallographic data:

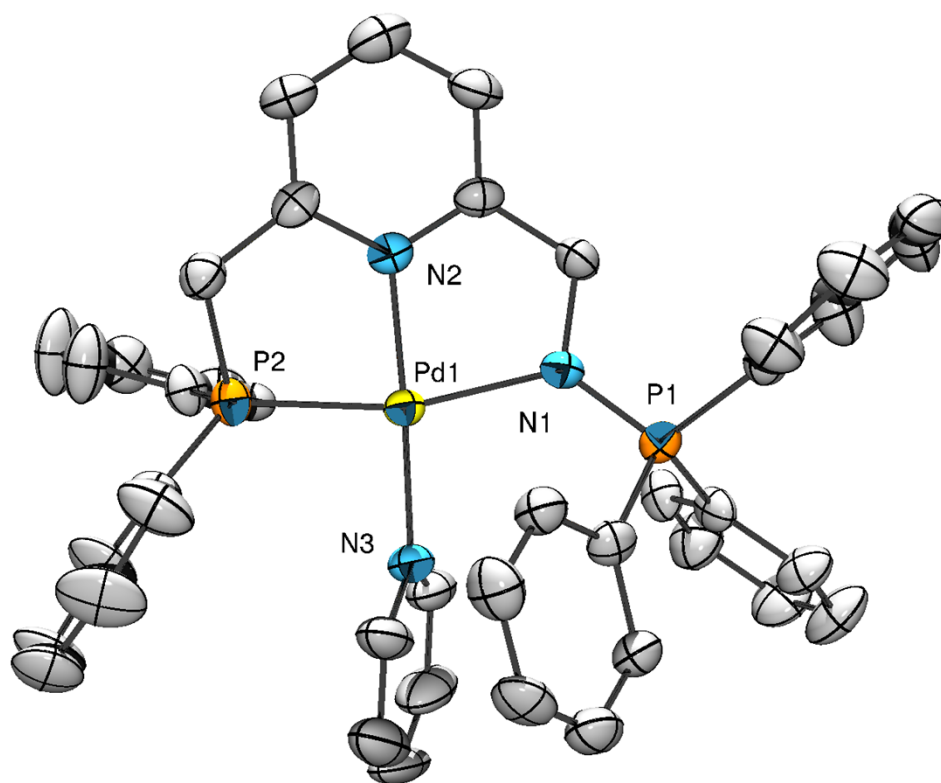

Figure S1. ORTEP of  $[\text{LPd}(\text{py})](\text{BF}_4)_2$  **2** – Hydrogen atoms and the two tetrafluoroborate anions were omitted for clarity. Selected bond lengths (Å) and angles (°): N1-P1 1,595(5), N1-Pd1 2,081(5), P2-Pd1 2,223(2), N2-Pd1 1,989(5), N3-Pd1 2,053(5); N1-Pd1-P2 163,8(1), N2-Pd1-N3 175,0(2), N1-Pd1-N2 80,7(2), P2-Pd1-N2 93,5(2), N1-Pd1-N3 102,5(2), P2-Pd1-N3 93,5(2).

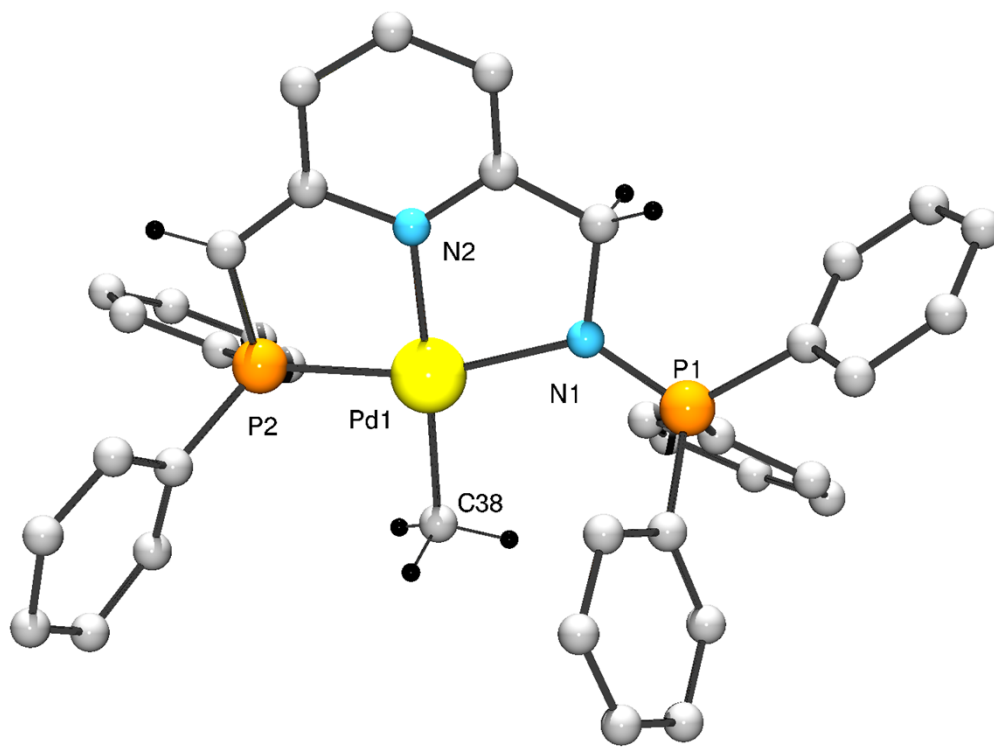

Figure S2. Solid-state connectivity of  $[L^*PdMe]$ .

$[L^*PdMe]$  crystallized as extremely thin needles, such shape prevents accurate data collection, no reflections can be found after *ca.*  $2\theta = 40^\circ$ . The compound crystallized in the P-1 space group with the following cell parameters:  $a = 9.779(1)$ ,  $b = 12.328(1)$ ,  $c = 13.266(1)$ ;  $\alpha = 97.909(1)$ ,  $\beta = 90.336(1)$ ,  $\gamma = 96.595(1)$ . From these low quality data, the connectivity can be determined as presented above. Notably, no counter anion could be localized in the asymmetric unit cell. However, the structure cannot be refined in an anisotropic way because of an insufficient number of parameters leading to non-positive definite thermal ellipsoids for several carbon atoms.

Crystallographic data:

| Compound           | 1                                                                                                           | 2                                                                                                       | 3                                                                    | 5                                                                                   |
|--------------------|-------------------------------------------------------------------------------------------------------------|---------------------------------------------------------------------------------------------------------|----------------------------------------------------------------------|-------------------------------------------------------------------------------------|
| Formula            | 'C <sub>37</sub> H <sub>32</sub> ClN <sub>2</sub> P <sub>2</sub> Pd,<br>C <sub>7</sub> H <sub>5</sub> N,Cl' | 'C <sub>42</sub> H <sub>37</sub> N <sub>3</sub> P <sub>2</sub> Pd,<br>(BF <sub>4</sub> ) <sub>2</sub> ' | 'C <sub>37</sub> H <sub>31</sub> ClN <sub>2</sub> P <sub>2</sub> Pd' | 'C <sub>56</sub> H <sub>34</sub> BF <sub>15</sub> N <sub>2</sub> P <sub>2</sub> Pd' |
| Mw                 | 847.00                                                                                                      | 925.70                                                                                                  | 707.43                                                               | 1199.00                                                                             |
| Space group        | P 2 <sub>1</sub> /c                                                                                         | P b c a                                                                                                 | P 2 <sub>1</sub> /n                                                  | P -1                                                                                |
| λ(Å)               | 0.71069                                                                                                     | 0.71069                                                                                                 | 0.71069                                                              | 0.71069                                                                             |
| a(Å)               | 9.635(1)                                                                                                    | 12.601(1)                                                                                               | 11.009(1)                                                            | 14.503(1)                                                                           |
| b(Å)               | 18.324(1)                                                                                                   | 16.725(1)                                                                                               | 12.528(1)                                                            | 14.797(1)                                                                           |
| c(Å)               | 23.370(1)                                                                                                   | 41.916(1)                                                                                               | 22.713(1)                                                            | 17.647(1)                                                                           |
| α(°)               | 90                                                                                                          | 90                                                                                                      | 90                                                                   | 78.966(1)                                                                           |
| β(°)               | 108.913(3)                                                                                                  | 90                                                                                                      | 92.606(1)                                                            | 69.404(1)                                                                           |
| γ(°)               | 90                                                                                                          | 90                                                                                                      | 90                                                                   | 72.013(1)                                                                           |
| V(Å <sup>3</sup> ) | 3903.3(5)                                                                                                   | 8833.9(9)                                                                                               | 3129.4(4)                                                            | 3357.2(4)                                                                           |
| Z                  | 4                                                                                                           | 8                                                                                                       | 4                                                                    | 2                                                                                   |
| d(g-cm-3)          | 1.441                                                                                                       | 1.392                                                                                                   | 1.502                                                                | 1.186                                                                               |
| F(000)             | 1728                                                                                                        | 3744                                                                                                    | 1440                                                                 | 1200                                                                                |
| μ(cm-1)            | 0.730                                                                                                       | 0.559                                                                                                   | 0.811                                                                | 0.397                                                                               |
| θ <sub>max</sub>   | 27.482                                                                                                      | 25.024                                                                                                  | 27.455                                                               | 30.032                                                                              |
| Rflns measd        | 32353                                                                                                       | 42918                                                                                                   | 40877                                                                | 36178                                                                               |
| Unique data        | 8915                                                                                                        | 7611                                                                                                    | 7143                                                                 | 19127                                                                               |
| Rint               | 0.0466                                                                                                      | 0.0386                                                                                                  | 0.1307                                                               | 0.0333                                                                              |
| wR2                | 0.0792                                                                                                      | 0.1557                                                                                                  | 0.1754                                                               | 0.1241                                                                              |
| R1                 | 0.0391                                                                                                      | 0.0713                                                                                                  | 0.0704                                                               | 0.0454                                                                              |
| GoF                | 1.077                                                                                                       | 1.225                                                                                                   | 1.151                                                                | 1.050                                                                               |
| CCDC Number        | 1414327                                                                                                     | 1414328                                                                                                 | 1414329                                                              | 1414330                                                                             |

## II. NMR spectra

Figure S3. Deuteration of the benzylic position by MeOD-d<sup>4</sup> (<sup>1</sup>H{<sup>31</sup>P} and <sup>31</sup>P{<sup>1</sup>H} in C<sub>6</sub>D<sub>6</sub> spectra)

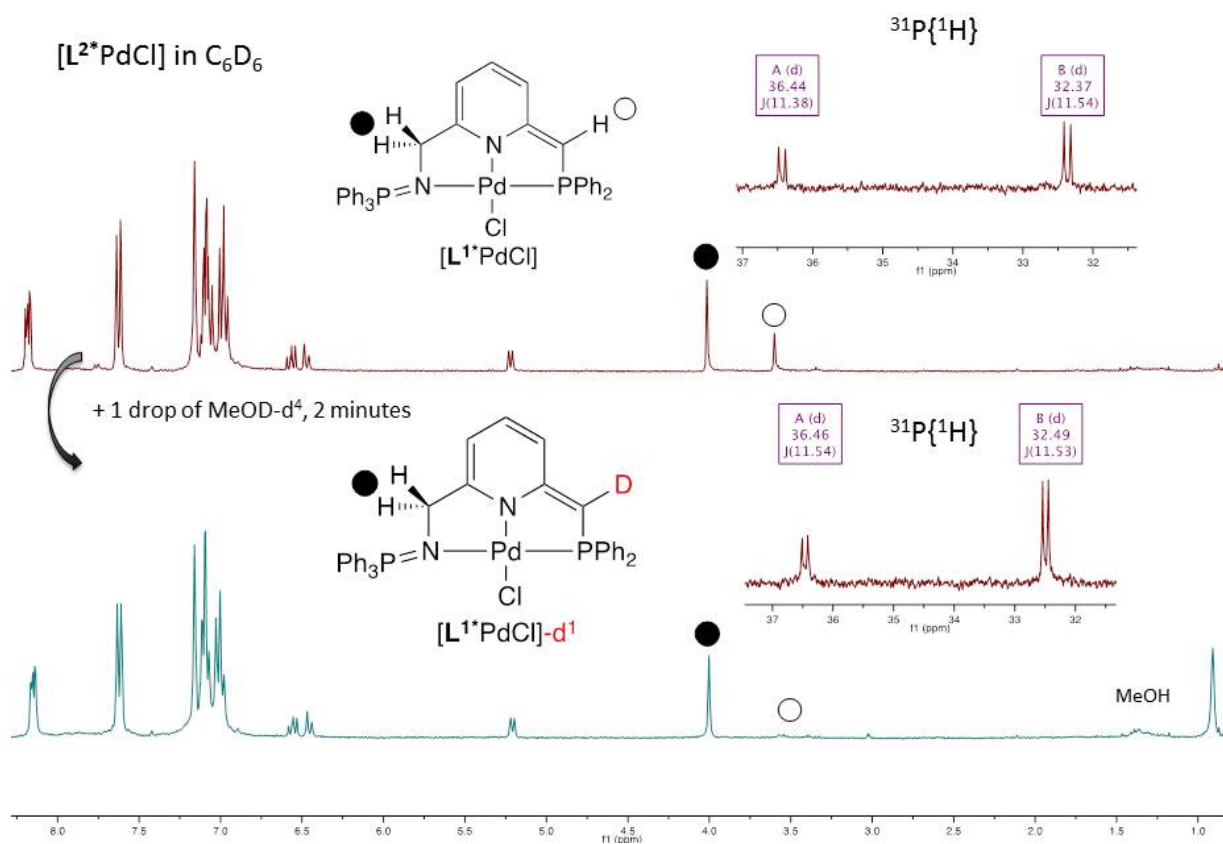

Figure S4. HSQC  $^1\text{H}$ - $^{13}\text{C}$  spectrum of **5** (blue =  $\text{CH}_2$ , red =  $\text{CH}$ ,  $\text{CH}_3$ ):

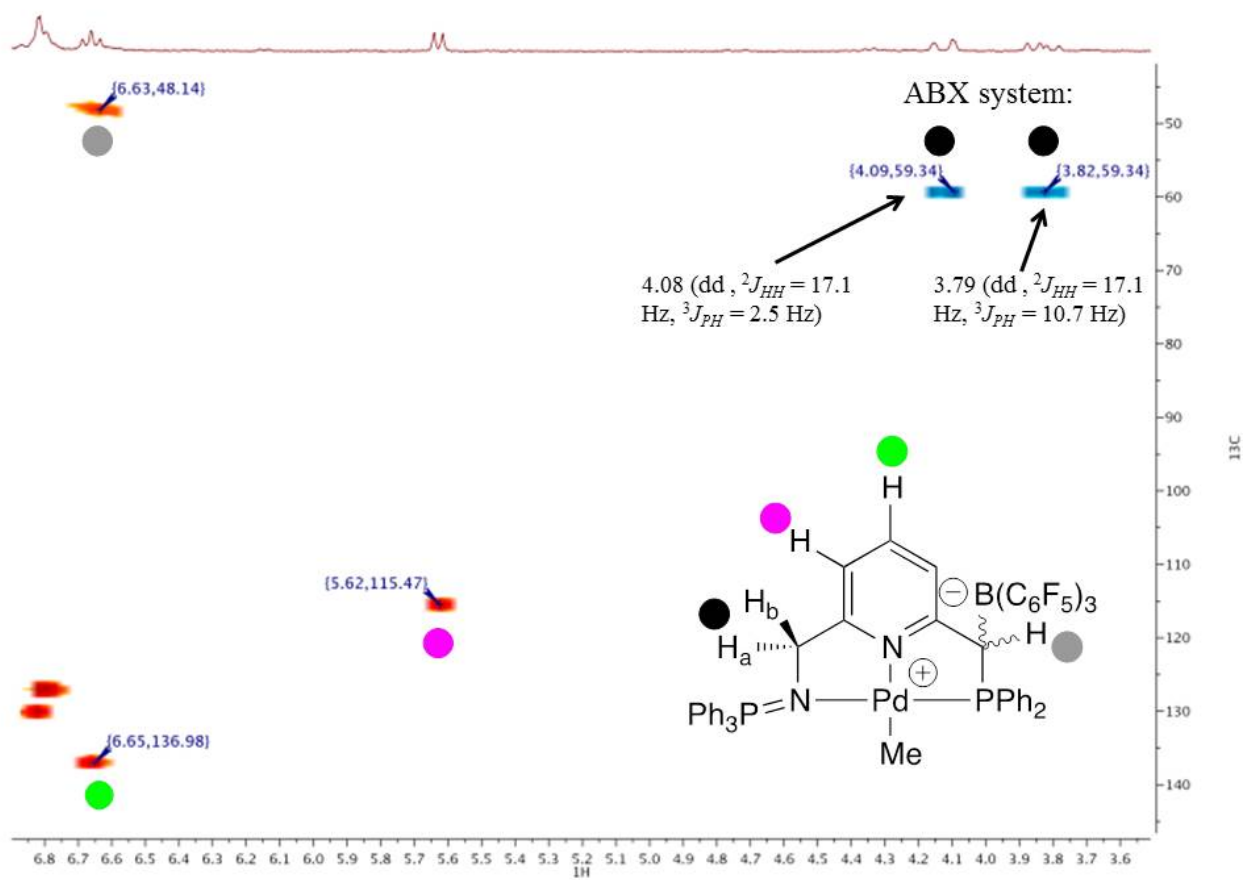

### III. $^1\text{H}$ DOSY NMR of $\text{L.LiCl}$

The  $^1\text{H}$  PGSE (DOSY) experiments were performed on the same spectrometer. The experiment was measured using the ledbpgp2s pulse program (Bruker) at a temperature of 293 K. A relaxation delay of 10 s was employed along with a diffusion time ( $\Delta$ ) of 50 ms and an eddy current delay of 5 ms. Bipolar gradient pulses ( $\delta/2$ ) of 2.2 ms and homospoil gradient pulses of 1.1 ms were used. The gradient strength of the 2 homospoil pulses were -17.13 % and -13.17 % respectively. Sixteen experiments of sixteen scans each were collected with the bipolar gradient strength, initially at 2 % (1<sup>st</sup> experiment), linearly increased to 98 % (16<sup>th</sup> experiment). All gradient pulses were sine shaped and after each application a recovery delay of 200  $\mu\text{s}$  was used. Further processing was achieved using the MestReNova software.

The DOSY spectrum of  $\text{L.LiCl}$  in  $\text{THF-d}_8$  is presented below, a diffusion coefficient of  $7.43 \cdot 10^{-6} \text{ cm}^2 \cdot \text{s}^{-1}$  is found, assuming a dynamic viscosity  $\eta = 0.48 \text{ cP}$  for the THF at 20°C, a hydrodynamic radius of 6 Å is obtained, corresponding to a volume of about 900 Å<sup>3</sup> for the approximating sphere.

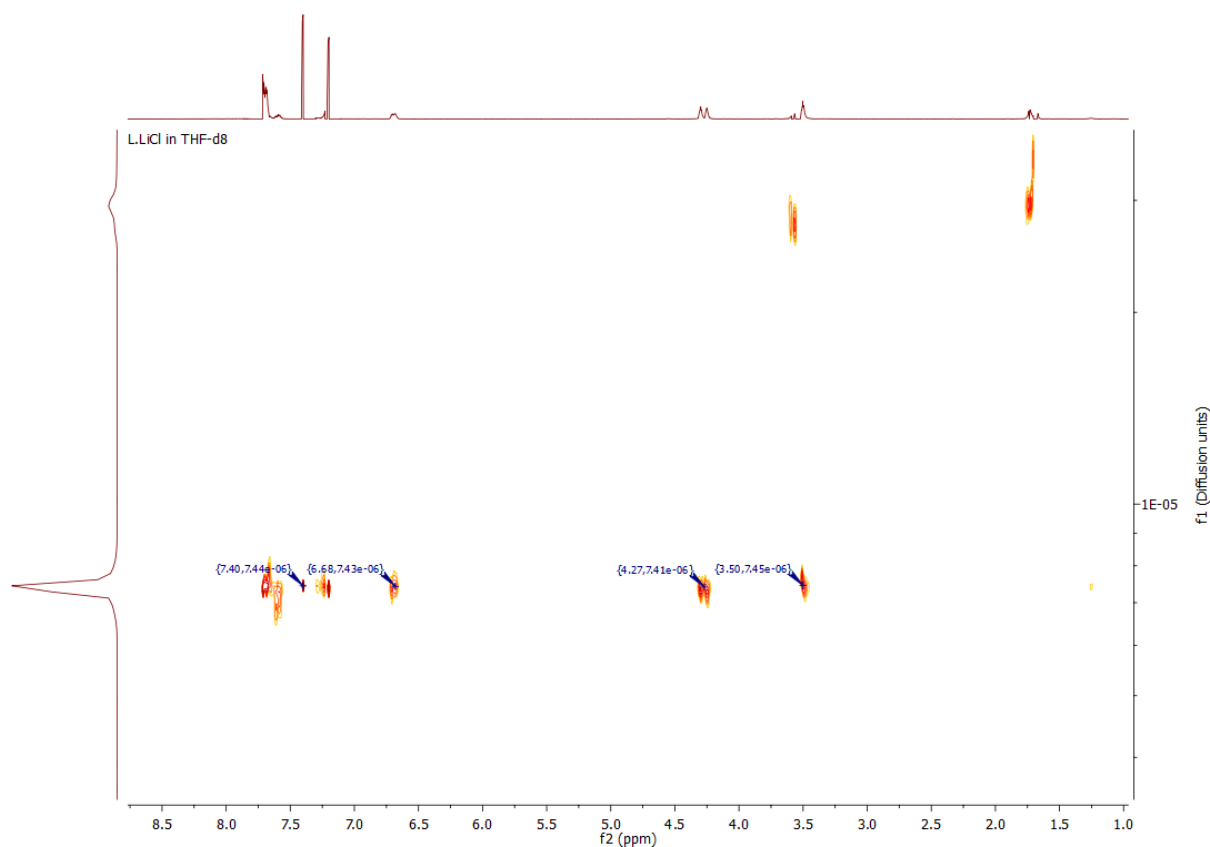

Figure S5.  $^1\text{H}$  DOSY NMR spectrum of  $\text{L.LiCl}$  in  $\text{THF-d}_8$

The DOSY spectrum of  $\text{L.LiCl}$  in  $\text{CDCl}_3$  is presented below, a diffusion coefficient of  $5.42 \cdot 10^{-6} \text{ cm}^2 \cdot \text{s}^{-1}$  is found, assuming a dynamic viscosity  $\eta = 0.563 \text{ cP}$  for the chloroform at 20°C, a hydrodynamic radius of 7 Å is obtained corresponding to a volume of about 1400 Å<sup>3</sup> for the corresponding sphere.



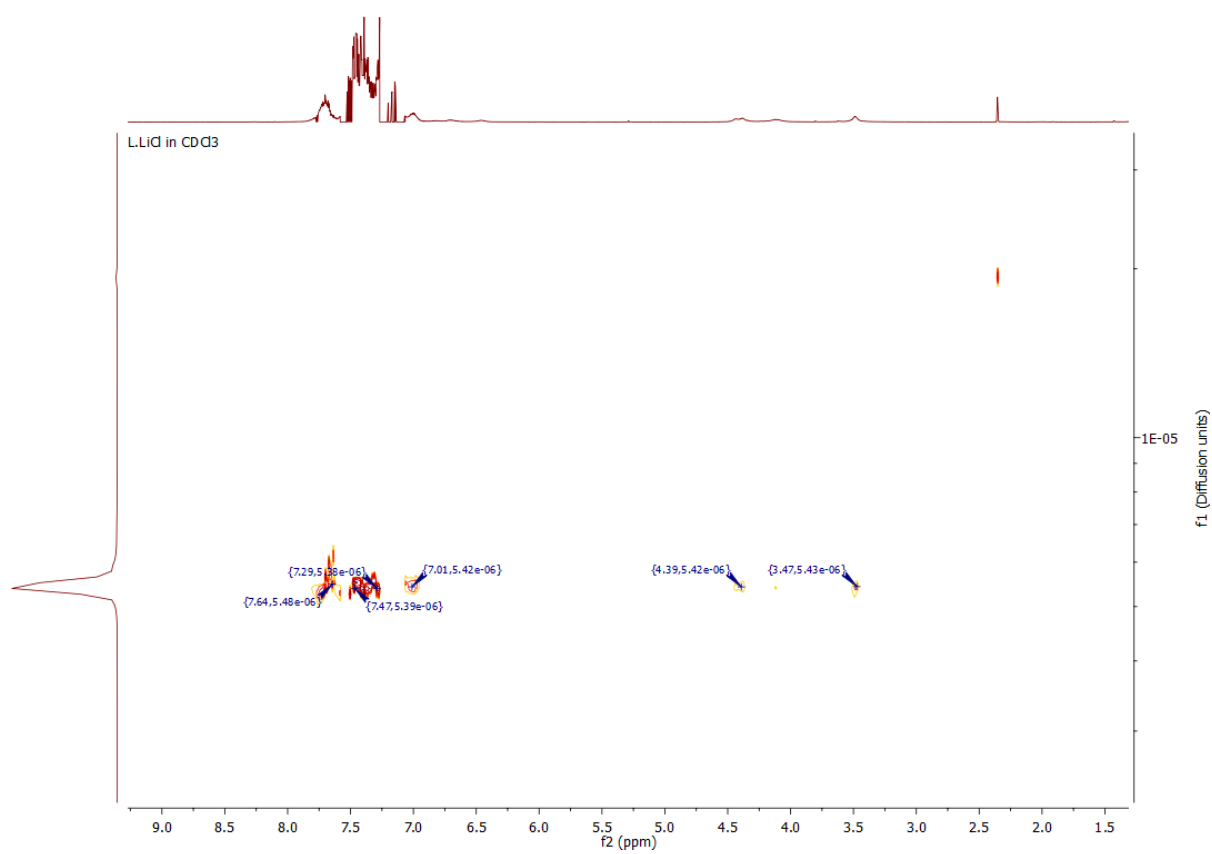

Figure S6. <sup>1</sup>H DOSY NMR spectrum of L.LiCl in CDCl<sub>3</sub>
